# Supplementary material for: Comprehensive profiling and characterization of cellular microRNAs in response to Coxsackievirus A10 infection in bronchial epithelial cells
Source: Research Square preprint supplement (doi:10.21203/rs.3.rs-1426284/v1), 2022-03-15
Supplement: Supplementary file 1 [file b440d31797a2f8e4410e3eee.docx]

**Table S1.** Selected miRNAs for RT-qPCR.

| **miRNA** | **Regulation direction** | **CV-A10-12 h** | **CV-A10-24 h** | **Target genes** |
| --- | --- | --- | --- | --- |
| **Log2FoldChange** | **Log2FoldChange** |
| hsa-miR-663a | Up | 4.453906746 | 8.933153556 | TGFB1 |
| hsa-miR-145-5p | Up | 1.623831748 | 2.862287225 | RYR1 |
| hsa-miR-455-3p | Down | -1.476304924 | -1.726887527 | PIK3R1 |
| hsa-miR-940 | Down | -1.463631094 | -3.225175616 | PNMA3，BE2Q1 |

**Table S2.** Summary of miRNA and mRNA primers used in RT-qPCR.

| **miRNAs or Target genes** | **Primers** |
| --- | --- |
| hsa-miR-663a | F：5’-GCGCCGCGGGA-3’  R：5’-CCAGTTTTTTTTTTTTTTTGCGGT-3’ |
| hsa-miR-145-5p | F：5’-GTCCAGTTTTCCCAGGAATC-3’  R：5’-AGGTCCAGTTTTTTTTTTTTTTTAGG-3’ |
| hsa-miR-455-3p | F：5’-GGCAGTCCATGGGCAT-3’  R：5’-GGTCCAGTTTTTTTTTTTTTTTGTGT-3’ |
| hsa-miR-940 | F：5’-GGGCCCCCGCT-3’  R：5’-CCAGTTTTTTTTTTTTTTTGGGGA-3’ |
| TGFB1 | F：5’-TACCTGAACCCGTGTTGCTCT-3’  R：5’-CTGCCGCACAACTCCGGTGA-3’ |
| RYR1 | F：5’-ACCGCCTAAATGTCTACACCAC-3’  R：5’-TTGCTACGATTGCCACGGAT-3’ |
| PIK3R1 | F：5’-GAATATACCCGCACATCCCA-3’  R：5’-TTTCTCATTGCCTTCACGTT-3’ |
| PNMA3 | F：5’-TTGTGTTACGTTTGGAACCCCT-3’  R：5’-TGGCCCCACTTAAGACTCGTT-3’ |
